# Supplementary material for: Association of TYK2 polymorphisms with autoimmune diseases: A comprehensive and updated systematic review with meta-analysis
Source: PubMed Central journal article supplement (PMC8097517; doi:10.1590/1678-4685-gmb-2020-0425), 2021-05-03
Supplement: 1415-4757-GMB-44-2-e20200425-s2.pdf [file 1415-4757-GMB-44-2-e20200425-s2.pdf]

## Supplementary Material to “Association of *TYK2* polymorphisms with autoimmune diseases: A comprehensive and updated systematic review with meta-analysis”

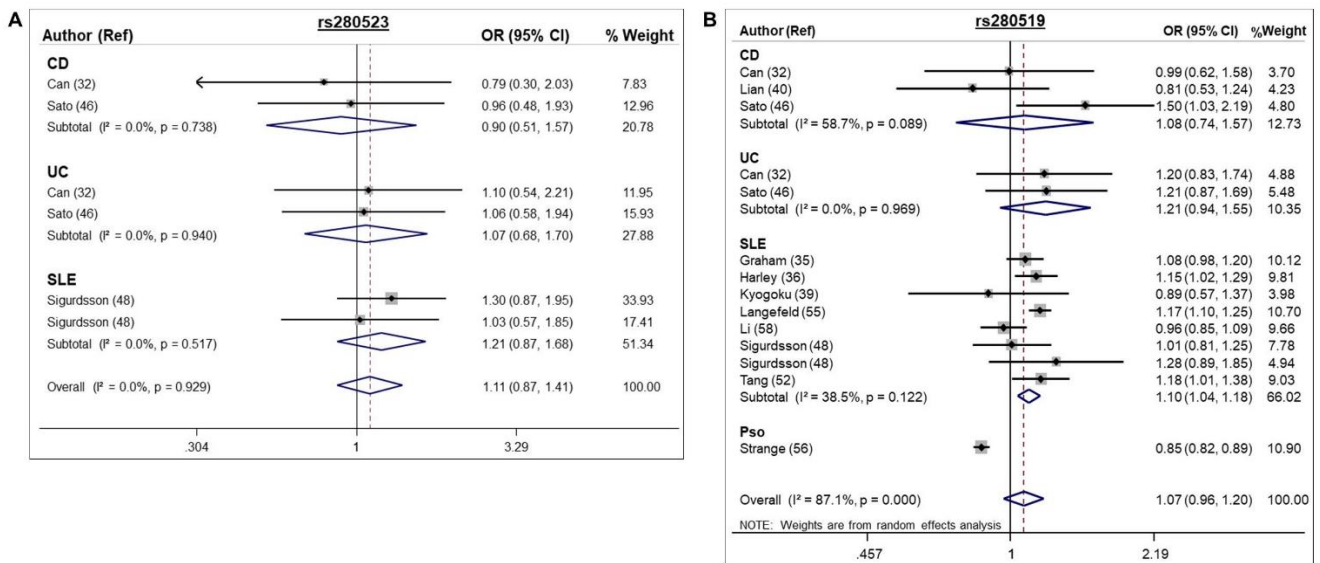

**Figure S2** - Forest plots showing individual and pooled OR (95% CI) for the associations between the *TYK2* rs280523 and rs280519 SNPs and autoimmune diseases, under an allele contrast model.
