# Supplementary material for: Association of TYK2 polymorphisms with autoimmune diseases: A comprehensive and updated systematic review with meta-analysis
Source: PubMed Central journal article supplement (PMC8097517; doi:10.1590/1678-4685-gmb-2020-0425), 2021-05-03
Supplement: 1415-4757-GMB-44-2-e20200425-s3.pdf [file 1415-4757-GMB-44-2-e20200425-s3.pdf]

**Supplementary Material to “Association of *TYK2* polymorphisms with autoimmune diseases: A comprehensive and updated systematic review with meta-analysis”**

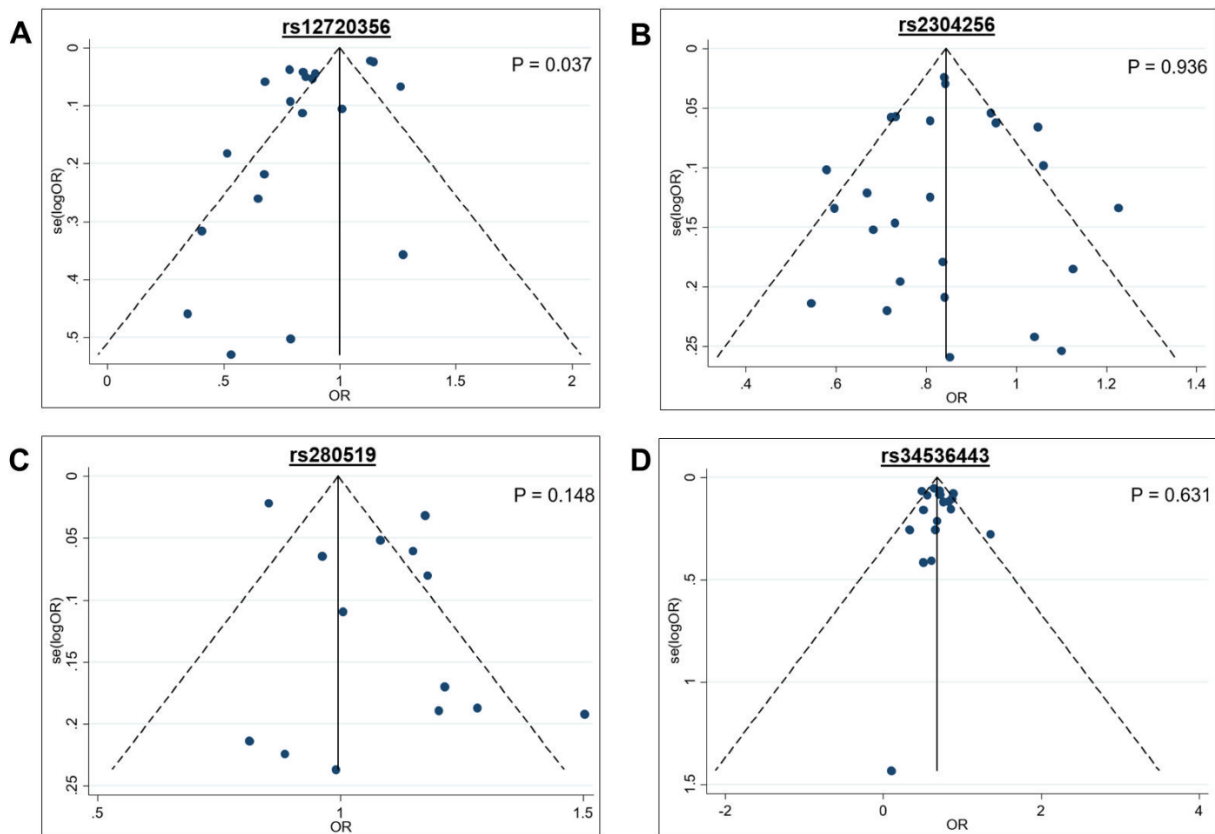

**Figure S3** - Begg's funnel plots for publication bias test for *TYK2* SNPs: **A)** rs12720356, **B)** rs2304256, **C)** rs280519, and **D)** rs34536443.
