# Supplementary material for: Association of TYK2 polymorphisms with autoimmune diseases: A comprehensive and updated systematic review with meta-analysis
Source: PubMed Central journal article supplement (PMC8097517; doi:10.1590/1678-4685-gmb-2020-0425), 2021-05-03
Supplement: 1415-4757-GMB-44-2-e20200425-s4.pdf [file 1415-4757-GMB-44-2-e20200425-s4.pdf]

**Supplementary Material to “Association of *TYK2* polymorphisms with autoimmune diseases: A comprehensive and updated systematic review with meta-analysis”**

**Table S1** - Genotype and allele distributions of the *TYK2* rs280496, rs280500, rs280519, rs280523, rs2304256, rs12720270, rs12720356, rs34536443, and rs35018800 SNPs in patients with autoimmune diseases (cases) and controls.

| <i>rs280496</i>          |         |           | Cases (n) by total and genotype |     |     |     | Controls (n) by total and genotype |     |     |     | G allele frequency (%) |          |
|--------------------------|---------|-----------|---------------------------------|-----|-----|-----|------------------------------------|-----|-----|-----|------------------------|----------|
| Author, year             | Disease | Ethnicity | Total                           | C/C | C/G | G/G | Total                              | C/C | C/G | G/G | Cases                  | Controls |
| Can <sup>a</sup> , 2015  | CD      | Asian     | 60                              | 34  | 24  | 2   | 89                                 | 51  | 34  | 4   | 0.233                  | 0.236    |
| Can <sup>b</sup> , 2015  | UC      | Asian     | 151                             | 82  | 60  | 9   | 89                                 | 51  | 34  | 4   | 0.258                  | 0.236    |
| Sato <sup>a</sup> , 2009 | CD      | Asian     | 83                              | 61  | 22  | 0   | 200                                | 162 | 38  | 0   | 0.133                  | 0.095    |
| Sato <sup>b</sup> , 2009 | UC      | Asian     | 114                             | ND  | ND  | ND  | 200                                | 162 | 38  | 0   | 0.103                  | 0.095    |
| <i>rs280500</i>          |         |           | Cases (n) by total and genotype |     |     |     | Controls (n) by total and genotype |     |     |     | A allele frequency (%) |          |
| Author, year             | Disease | Ethnicity | Total                           | G/G | G/A | A/A | Total                              | G/G | G/A | A/A | Cases                  | Controls |
| Contreras-Cubas, 2019    | SLE     | Mixed     | 368                             | ND  | ND  | ND  | 516                                | ND  | ND  | ND  | 0.061                  | 0.052    |
| Harley, 2008             | SLE     | Caucasian | 720                             | ND  | ND  | ND  | 2,337                              | ND  | ND  | ND  | 0.160                  | 0.160    |

|                                |                |                  |                                        |            |            |            |                                           |            |            |            |                               |                 |
|--------------------------------|----------------|------------------|----------------------------------------|------------|------------|------------|-------------------------------------------|------------|------------|------------|-------------------------------|-----------------|
| Li, 2011                       | SLE            | Asian            | 669                                    | ND         | ND         | ND         | 2,538                                     | ND         | ND         | ND         | 0.044                         | 0.046           |
| Sigurdsson <sup>d</sup> , 2005 | SLE            | Caucasian        | 480                                    | ND         | ND         | ND         | 256                                       | ND         | ND         | ND         | 0.180                         | 0.190           |
| Sigurdsson <sup>e</sup> , 2005 | SLE            | Caucasian        | 109                                    | ND         | ND         | ND         | 121                                       | ND         | ND         | ND         | 0.160                         | 0.170           |
| Tang, 2015                     | SLE            | Asian            | 642                                    | 352        | 228        | 62         | 672                                       | 408        | 229        | 35         | 0.290                         | 0.220           |
| <b><i>rs280519</i></b>         |                |                  |                                        |            |            |            |                                           |            |            |            |                               |                 |
|                                |                |                  | <b>Cases (n) by total and genotype</b> |            |            |            | <b>Controls (n) by total and genotype</b> |            |            |            | <b>A allele frequency (%)</b> |                 |
| <b>Author, year</b>            | <b>Disease</b> | <b>Ethnicity</b> | <b>Total</b>                           | <b>G/G</b> | <b>G/A</b> | <b>A/A</b> | <b>Total</b>                              | <b>G/G</b> | <b>G/A</b> | <b>A/A</b> | <b>Cases</b>                  | <b>Controls</b> |
| Can <sup>a</sup> , 2015        | CD             | Asian            | 60                                     | 20         | 25         | 15         | 89                                        | 22         | 52         | 15         | 0.458                         | 0.461           |
| Can <sup>b</sup> , 2015        | UC             | Asian            | 151                                    | 43         | 63         | 45         | 89                                        | 22         | 52         | 15         | 0.507                         | 0.461           |
| Graham, 2011                   | SLE            | Caucasian        | 870                                    | ND         | ND         | ND         | 5,551                                     | ND         | ND         | ND         | 0.490                         | 0.470           |
| Harley, 2008                   | SLE            | Caucasian        | 720                                    | ND         | ND         | ND         | 2,337                                     | ND         | ND         | ND         | 0.530                         | 0.490           |
| Kyogoku, 2009                  | SLE            | Asian            | 69                                     | 19         | 33         | 17         | 94                                        | 21         | 49         | 24         | 0.793                         | 0.512           |
| Langefeld, 2017                | SLE            | Caucasian        | 3,174                                  | ND         | ND         | ND         | 5,464                                     | ND         | ND         | ND         | 0.519                         | 0.479           |
| Li, 2011                       | SLE            | Asian            | 669                                    | ND         | ND         | ND         | 2,538                                     | ND         | ND         | ND         | 0.357                         | 0.349           |
| Lian, 2013                     | CD             | Asian            | 80                                     | 26         | 41         | 13         | 100                                       | 29         | 48         | 23         | 0.325                         | 0.375           |
| Sato <sup>a</sup> , 2009       | CD             | Asian            | 83                                     | 11         | 35         | 37         | 200                                       | 39         | 98         | 63         | 0.657                         | 0.560           |
| Sato <sup>b</sup> , 2009       | UC             | Asian            | 114                                    | ND         | ND         | ND         | 200                                       | 39         | 98         | 63         | 0.607                         | 0.560           |
| Sigurdsson <sup>d</sup> , 2005 | SLE            | Caucasian        | 480                                    | ND         | ND         | ND         | 256                                       | ND         | ND         | ND         | 0.510                         | 0.510           |

|                                |                |                  |                                        |            |            |            |                                           |            |            |            |                               |                 |
|--------------------------------|----------------|------------------|----------------------------------------|------------|------------|------------|-------------------------------------------|------------|------------|------------|-------------------------------|-----------------|
| Sigurdsson <sup>c</sup> , 2005 | SLE            | Caucasian        | 109                                    | ND         | ND         | ND         | 121                                       | ND         | ND         | ND         | 0.460                         | 0.520           |
| Strange, 2010                  | Pso            | Caucasian        | 6,748                                  | ND         | ND         | ND         | 11,516                                    | ND         | ND         | ND         | 0.510                         | 0.470           |
| Tang, 2015                     | SLE            | Asian            | 642                                    | 183        | 270        | 189        | 612                                       | 150        | 256        | 206        | 0.510                         | 0.550           |
| <i>rs280523</i>                |                |                  | <b>Cases (n) by total and genotype</b> |            |            |            | <b>Control (n) by total and genotype</b>  |            |            |            | <b>A allele frequency (%)</b> |                 |
| <b>Author, year</b>            | <b>Disease</b> | <b>Ethnicity</b> | <b>Total</b>                           | <b>G/G</b> | <b>G/A</b> | <b>A/A</b> | <b>Total</b>                              | <b>G/G</b> | <b>G/A</b> | <b>A/A</b> | <b>Cases</b>                  | <b>Controls</b> |
| Can <sup>a</sup> , 2015        | CD             | Asian            | 60                                     | 53         | 7          | 0          | 89                                        | 76         | 13         | 0          | 0.058                         | 0.073           |
| Can <sup>b</sup> , 2015        | UC             | Asian            | 151                                    | 128        | 22         | 1          | 89                                        | 76         | 13         | 0          | 0.079                         | 0.073           |
| Sato <sup>a</sup> , 2009       | CD             | Asian            | 83                                     | 71         | 12         | 0          | 200                                       | 170        | 30         | 0          | 0.072                         | 0.075           |
| Sato <sup>b</sup> , 2009       | UC             | Asian            | 114                                    | ND         | ND         | ND         | 200                                       | 170        | 30         | 0          | 0.076                         | 0.075           |
| Sigurdsson <sup>d</sup> , 2005 | SLE            | Caucasian        | 480                                    | ND         | ND         | ND         | 256                                       | ND         | ND         | ND         | 0.090                         | 0.070           |
| Sigurdsson <sup>e</sup> , 2005 | SLE            | Caucasian        | 109                                    | ND         | ND         | ND         | 121                                       | ND         | ND         | ND         | 0.110                         | 0.110           |
| <i>rs2304256</i>               |                |                  | <b>Cases (n) by total and genotype</b> |            |            |            | <b>Controls (n) by total and genotype</b> |            |            |            | <b>A allele frequency (%)</b> |                 |
| <b>Author, year</b>            | <b>Disease</b> | <b>Ethnicity</b> | <b>Total</b>                           | <b>C/C</b> | <b>C/A</b> | <b>A/A</b> | <b>Total</b>                              | <b>C/C</b> | <b>C/A</b> | <b>A/A</b> | <b>Cases</b>                  | <b>Controls</b> |
| Almlöf, 2017                   | SLE            | Caucasian        | 1,160                                  | 665        | 442        | 53         | 2,711                                     | 1,334      | 1,144      | 232        | 0.236                         | 0.297           |
| Alonso-Pérez, 2014             | SLE            | Caucasian        | 1,457                                  | ND         | ND         | ND         | 1,728                                     | ND         | ND         | ND         | 0.234                         | 0.275           |
| Can <sup>a</sup> , 2015        | CD             | Asian            | 60                                     | 11         | 15         | 34         | 89                                        | 7          | 35         | 47         | 0.308                         | 0.275           |
| Can <sup>b</sup> , 2015        | UC             | Asian            | 151                                    | 28         | 38         | 85         | 89                                        | 7          | 35         | 47         | 0.311                         | 0.275           |

|                                |      |                        |       |       |       |     |        |       |       |     |       |       |
|--------------------------------|------|------------------------|-------|-------|-------|-----|--------|-------|-------|-----|-------|-------|
| Contreras-Cubas, 2019          | SLE  | Mixed                  | 368   | ND    | ND    | ND  | 516    | ND    | ND    | ND  | 0.169 | 0.203 |
| Graciolo <sup>h</sup> , 2019   | T1DM | Mixed                  | 151   | 86    | 57    | 8   | 169    | 98    | 63    | 8   | 0.241 | 0.233 |
| Graciolo <sup>i</sup> , 2019   | T1DM | Mixed                  | 156   | 103   | 45    | 8   | 150    | 83    | 60    | 7   | 0.195 | 0.246 |
| Hellquist, 2009                | SLE  | Caucasian              | 265   | ND    | ND    | ND  | 344    | ND    | ND    | ND  | 0.210 | 0.310 |
| Järvinen <sup>h</sup> , 2010   | SLE  | Caucasian              | 169   | ND    | ND    | ND  | 344    | ND    | ND    | ND  | 0.240 | 0.310 |
| Järvinen <sup>i</sup> , 2010   | SLE  | Caucasian              | 39    | ND    | ND    | ND  | 344    | ND    | ND    | ND  | 0.330 | 0.310 |
| Kyogoku, 2009                  | SLE  | Asian                  | 411   | 160   | 180   | 71  | 467    | 175   | 231   | 61  | 0.392 | 0.378 |
| Li, 2011                       | SLE  | Asian                  | 669   | ND    | ND    | ND  | 2,538  | ND    | ND    | ND  | 0.424 | 0.413 |
| Lian, 2013                     | CD   | Asian                  | 80    | 38    | 42    | 0   | 100    | 49    | 51    | 0   | 0.262 | 0.255 |
| López-Isac <sup>d</sup> , 2016 | MS   | American/<br>Caucasian | 7,103 | 4,140 | 2,530 | 433 | 12,220 | 6,499 | 4,790 | 931 | 0.239 | 0.272 |
| López-Isac <sup>e</sup> , 2016 | MS   | American/<br>Caucasian | 4,985 | 2,827 | 1,826 | 332 | 7,478  | 3,848 | 3,022 | 608 | 0.250 | 0.283 |
| Nagafuchi, 2015                | T1DM | Asian                  | 244   | 103   | 104   | 37  | 254    | 115   | 116   | 23  | 0.364 | 0.318 |
| Sato <sup>a</sup> , 2009       | CD   | Asian                  | 83    | 52    | 25    | 6   | 200    | 86    | 90    | 24  | 0.233 | 0.345 |
| Sato <sup>b</sup> , 2009       | UC   | Asian                  | 114   | ND    | ND    | ND  | 200    | 86    | 90    | 24  | 0.304 | 0.345 |
| Sigurdsson <sup>d</sup> , 2005 | SLE  | Caucasian              | 480   | ND    | ND    | ND  | 256    | ND    | ND    | ND  | 0.240 | 0.320 |

|                                |     |           |       |     |     |     |       |     |     |     |       |       |
|--------------------------------|-----|-----------|-------|-----|-----|-----|-------|-----|-----|-----|-------|-------|
| Sigurdsson <sup>e</sup> , 2005 | SLE | Caucasian | 109   | ND  | ND  | ND  | 121   | ND  | ND  | ND  | 0.210 | 0.270 |
| Sigurdsson, 2007               | RA  | Caucasian | 1,530 | ND  | ND  | ND  | 861   | ND  | ND  | ND  | 0.290 | 0.300 |
| Suarez-Gestal, 2009            | SLE | Caucasian | 1,546 | 930 | 559 | 57  | 1,725 | 903 | 684 | 138 | 0.233 | 0.278 |
| Suarez-Gestal, 2009            | RA  | Caucasian | 1,635 | ND  | ND  | ND  | 1,906 | ND  | ND  | ND  | 0.258 | 0.269 |
| Tang, 2015                     | SLE | Asian     | 642   | 27  | 248 | 367 | 642   | 17  | 160 | 465 | 0.210 | 0.140 |
| Zaplakhova, 2018               | MS  | Asian     | 224   | 142 | 69  | 13  | 312   | 168 | 120 | 24  | 0.212 | 0.269 |

| <i>rs12720270</i>              |         |           | Cases (n) by total and genotype |     |     |     | Controls (n) by total and genotype |     |     |     | A allele frequency (%) |          |
|--------------------------------|---------|-----------|---------------------------------|-----|-----|-----|------------------------------------|-----|-----|-----|------------------------|----------|
| Author, year                   | Disease | Ethnicity | Total                           | G/G | G/A | A/A | Total                              | G/G | G/A | A/A | Cases                  | Controls |
| Contreras-Cubas, 2019          | SLE     | Mixed     | 368                             | ND  | ND  | ND  | 516                                | ND  | ND  | ND  | 0.156                  | 0.176    |
| Hellquist, 2009                | SLE     | Caucasian | 258                             | ND  | ND  | ND  | 339                                | ND  | ND  | ND  | 0.150                  | 0.220    |
| Järvinen <sup>h</sup> , 2010   | SLE     | Caucasian | 159                             | ND  | ND  | ND  | 339                                | ND  | ND  | ND  | 0.190                  | 0.220    |
| Järvinen <sup>i</sup> , 2010   | SLE     | Caucasian | 38                              | ND  | ND  | ND  | 339                                | ND  | ND  | ND  | 0.260                  | 0.220    |
| Kyogoku, 2009                  | SLE     | Asian     | 69                              | 25  | 31  | 13  | 94                                 | 34  | 50  | 10  | 0.413                  | 0.372    |
| Li, 2011                       | SLE     | Asian     | 669                             | ND  | ND  | ND  | 2,538                              | ND  | ND  | ND  | 0.453                  | 0.443    |
| Sigurdsson <sup>d</sup> , 2005 | SLE     | Caucasian | 480                             | ND  | ND  | ND  | 256                                | ND  | ND  | ND  | 0.180                  | 0.170    |
| Sigurdsson <sup>e</sup> , 2005 | SLE     | Caucasian | 109                             | ND  | ND  | ND  | 121                                | ND  | ND  | ND  | 0.140                  | 0.180    |
| Tang, 2015                     | SLE     | Asian     | 642                             | 2   | 95  | 545 | 642                                | 2   | 101 | 539 | 0.370                  | 0.360    |

| <i>rs12720356</i>              |         |                        | Cases (n) by total and genotype |       |     | Controls (n) by total and genotype |        |        | C allele frequency (%) |     |       |          |
|--------------------------------|---------|------------------------|---------------------------------|-------|-----|------------------------------------|--------|--------|------------------------|-----|-------|----------|
| Author, year                   | Disease | Ethnicity              | Total                           | AA    | A/C | C/C                                | Total  | A/A    | A/C                    | C/C | Cases | Controls |
| Almlöf, 2017                   | SLE     | Caucasian              | 1,158                           | 996   | 154 | 8                                  | 2,711  | 2,241  | 444                    | 26  | 0.073 | 0.091    |
| Contreras-Cubas, 2019          | SLE     | Mixed                  | 368                             | ND    | ND  | ND                                 | 516    | ND     | ND                     | ND  | 0.007 | 0.023    |
| Diogo <sup>a</sup> , 2015      | RA      | Caucasian              | 4,726                           | ND    | ND  | ND                                 | 13,683 | ND     | ND                     | ND  | 0.076 | 0.084    |
| Diogo <sup>b</sup> , 2015      | SLE     | Caucasian              | 3,053                           | ND    | ND  | ND                                 | 13,683 | ND     | ND                     | ND  | 0.075 | 0.085    |
| Diogo <sup>c</sup> , 2015      | IBD     | Caucasian              | 1,346                           | ND    | ND  | ND                                 | 13,683 | ND     | ND                     | ND  | 0.104 | 0.085    |
| Ellinghaus <sup>a</sup> , 2016 | CD      | Caucasian              | 19,085                          | ND    | ND  | ND                                 | 34,213 | ND     | ND                     | ND  | 0.094 | 0.084    |
| Ellinghaus <sup>b</sup> , 2016 | Pso     | Caucasian              | 6,530                           | ND    | ND  | ND                                 | 34,213 | ND     | ND                     | ND  | 0.067 | 0.084    |
| Ellinghaus <sup>c</sup> , 2016 | UC      | Caucasian              | 14,413                          | ND    | ND  | ND                                 | 34,213 | ND     | ND                     | ND  | 0.095 | 0.084    |
| Harley, 2008                   | SLE     | Caucasian              | 720                             | ND    | ND  | ND                                 | 2,711  | ND     | ND                     | ND  | 0.070 | 0.080    |
| Hellquist, 2009                | SLE     | Caucasian              | 277                             | ND    | ND  | ND                                 | 356    | ND     | ND                     | ND  | 0.070 | 0.090    |
| Järvinen <sup>h</sup> , 2010   | SLE     | Caucasian              | 177                             | ND    | ND  | ND                                 | 356    | ND     | ND                     | ND  | 0.020 | 0.090    |
| Järvinen <sup>i</sup> , 2010   | SLE     | Caucasian              | 42                              | ND    | ND  | ND                                 | 356    | ND     | ND                     | ND  | 0.050 | 0.090    |
| López-Isac <sup>d</sup> , 2016 | MS      | American/<br>Caucasian | 7,103                           | 6,197 | 879 | 27                                 | 12,220 | 10,399 | 1,759                  | 62  | 0.066 | 0.077    |
| López-Isac <sup>e</sup> , 2016 | MS      | American/              | 4,985                           | 4,347 | 602 | 36                                 | 7,478  | 6,356  | 1,072                  | 50  | 0.068 | 0.078    |

|                                |         |           | Cases (n) by total and genotype        |     |     |     | Controls (n) by total and genotype        |     |     |     | C allele frequency (%)        |          |
|--------------------------------|---------|-----------|----------------------------------------|-----|-----|-----|-------------------------------------------|-----|-----|-----|-------------------------------|----------|
| Author, year                   | Disease | Ethnicity | Total                                  | G/G | G/C | C/C | Total                                     | G/G | G/C | C/C | Cases                         | Controls |
| Prieto-Pérez, 2015             | Pso     | Caucasian | 191                                    | 176 | 15  | 0   | 197                                       | 164 | 30  | 3   | 0.037                         | 0.091    |
| Shaiq, 2013                    | Pso     | Asian     | 351                                    | ND  | ND  | ND  | 593                                       | ND  | ND  | ND  | 0.009                         | 0.010    |
| Strange, 2010                  | Pso     | Caucasian | 3,174                                  | ND  | ND  | ND  | 5,464                                     | ND  | ND  | ND  | 0.070                         | 0.010    |
| Sigurdsson <sup>d</sup> , 2005 | SLE     | Caucasian | 480                                    | ND  | ND  | ND  | 256                                       | ND  | ND  | ND  | 0.070                         | 0.130    |
| Sigurdsson <sup>e</sup> , 2005 | SLE     | Caucasian | 109                                    | ND  | ND  | ND  | 121                                       | ND  | ND  | ND  | 0.080                         | 0.070    |
| Sigurdsson, 2007               | RA      | Caucasian | 1,530                                  | ND  | ND  | ND  | 861                                       | ND  | ND  | ND  | 0.090                         | 0.090    |
| <b><i>rs34536443</i></b>       |         |           | <b>Cases (n) by total and genotype</b> |     |     |     | <b>Controls (n) by total and genotype</b> |     |     |     | <b>C allele frequency (%)</b> |          |
| Author, year                   | Disease | Ethnicity | Total                                  | G/G | G/C | C/C | Total                                     | G/G | G/C | C/C | Cases                         | Controls |
| Ban, 2009                      | MS      | Caucasian | 2,753                                  | ND  | ND  | ND  | 1,104                                     | ND  | ND  | ND  | 0.035                         | 0.048    |
| Contreras-Cubas, 2019          | SLE     | Mixed     | 368                                    | ND  | ND  | ND  | 516                                       | ND  | ND  | ND  | 0.012                         | 0.021    |
| Couturier, 2011                | MS      | Caucasian | 726                                    | ND  | ND  | ND  | 522                                       | ND  | ND  | ND  | 0.051                         | 0.096    |
| Diogo <sup>a</sup> , 2015      | RA      | Caucasian | 4,726                                  | ND  | ND  | ND  | 13,687                                    | ND  | ND  | ND  | 0.031                         | 0.043    |
| Diogo <sup>b</sup> , 2015      | SLE     | Caucasian | 3,053                                  | ND  | ND  | ND  | 13,687                                    | ND  | ND  | ND  | 0.024                         | 0.043    |
| Diogo <sup>c</sup> , 2015      | IBD     | Caucasian | 1,346                                  | ND  | ND  | ND  | 13,687                                    | ND  | ND  | ND  | 0.034                         | 0.043    |
| Langefeld <sup>d</sup> , 2017  | SLE     | Caucasian | 6,748                                  | ND  | ND  | ND  | 11,516                                    | ND  | ND  | ND  | 0.022                         | 0.042    |
| Langefeld <sup>e</sup> , 2017  | SLE     | Hispanic  | 1,872                                  | ND  | ND  | ND  | 2,016                                     | ND  | ND  | ND  | 0.005                         | 0.019    |

|                                |                |                        |                                        |            |            |            |                                           |            |            |            |                               |                 |
|--------------------------------|----------------|------------------------|----------------------------------------|------------|------------|------------|-------------------------------------------|------------|------------|------------|-------------------------------|-----------------|
| López-Isac <sup>d</sup> , 2016 | MS             | American/<br>Caucasian | 7,103                                  | 6,901      | 202        | 0          | 12,220                                    | 11,735     | 480        | 5          | 0.014                         | 0.020           |
| López-Isac <sup>e</sup> , 2016 | MS             | American/<br>Caucasian | 4,985                                  | 4,727      | 257        | 1          | 7,478                                     | 7,055      | 409        | 14         | 0.026                         | 0.029           |
| Mero <sup>d</sup> , 2010       | MS             | Caucasian              | 1,112                                  | ND         | ND         | ND         | 1,147                                     | ND         | ND         | ND         | 0.036                         | 0.042           |
| Mero <sup>e</sup> , 2010       | MS             | Caucasian              | 810                                    | ND         | ND         | ND         | 1,079                                     | ND         | ND         | ND         | 0.021                         | 0.031           |
| Mero <sup>f</sup> , 2010       | MS             | Caucasian              | 1,396                                  | ND         | ND         | ND         | 2,064                                     | ND         | ND         | ND         | 0.042                         | 0.051           |
| Mero <sup>g</sup> , 2010       | MS             | Caucasian              | 2,111                                  | ND         | ND         | ND         | 1,877                                     | ND         | ND         | ND         | 0.032                         | 0.042           |
| Mohamadhosseini, 2019          | RA             | Asian                  | 700                                    | 691        | 8          | 1          | 700                                       | 693        | 7          | 0          | 0.017                         | 0.026           |
| Myrthianou <sup>a</sup> , 2017 | RA             | Caucasian              | 392                                    | 385        | 5          | 2          | 507                                       | 488        | 19         | 0          | 0.011                         | 0.019           |
| Myrthianou <sup>b</sup> , 2017 | Pso            | Caucasian              | 126                                    | 126        | 0          | 0          | 507                                       | 488        | 19         | 0          | 0.000                         | 0.019           |
| Qiu, 2013                      | MS             | Australian             | 349                                    | ND         | ND         | ND         | 498                                       | ND         | ND         | ND         | 0.069                         | 0.104           |
| Westra, 2018                   | T1DM           | Caucasian              | 9,334                                  | ND         | ND         | ND         | 11,111                                    | ND         | ND         | ND         | 0.030                         | 0.046           |
| <i>rs35018800</i>              |                |                        | <b>Cases (n) by total and genotype</b> |            |            |            | <b>Controls (n) by total and genotype</b> |            |            |            | <b>A allele frequency (%)</b> |                 |
| <b>Author, year</b>            | <b>Disease</b> | <b>Ethnicity</b>       | <b>Total</b>                           | <b>G/G</b> | <b>G/A</b> | <b>A/A</b> | <b>Total</b>                              | <b>G/G</b> | <b>G/A</b> | <b>A/A</b> | <b>Cases</b>                  | <b>Controls</b> |
| Diogo <sup>a</sup> , 2010      | RA             | Caucasian              | 4,726                                  | ND         | ND         | ND         | 13,687                                    | ND         | ND         | ND         | 0.0056                        | 0.0076          |
| Diogo <sup>b</sup> , 2010      | SLE            | Caucasian              | 3,053                                  | ND         | ND         | ND         | 13,687                                    | ND         | ND         | ND         | 0.0028                        | 0.0076          |

|                                |     |                        |        |       |    |    |        |        |     |    |        |        |
|--------------------------------|-----|------------------------|--------|-------|----|----|--------|--------|-----|----|--------|--------|
| Diogo <sup>c</sup> , 2010      | IBD | Caucasian              | 1,346  | ND    | ND | ND | 13,687 | ND     | ND  | ND | 0.0052 | 0.0076 |
| Ellinghaus <sup>a</sup> , 2016 | CD  | Caucasian              | 19,085 | ND    | ND | ND | 34,213 | ND     | ND  | ND | 0.0052 | 0.0087 |
| Ellinghaus <sup>b</sup> , 2016 | Pso | Caucasian              | 6,530  | ND    | ND | ND | 34,213 | ND     | ND  | ND | 0.0045 | 0.0087 |
| Ellinghaus <sup>c</sup> , 2016 | UC  | Caucasian              | 14,413 | ND    | ND | ND | 34,213 | ND     | ND  | ND | 0.0057 | 0.0087 |
| López-Isac <sup>d</sup> , 2016 | MS  | American/<br>Caucasian | 7,103  | 7,046 | 57 | 0  | 12,220 | 12,053 | 167 | 0  | 0.0040 | 0.0070 |
| López-Isac <sup>e</sup> , 2016 | MS  | American/<br>Caucasian | 4,985  | 4,942 | 43 | 0  | 7,478  | 7,349  | 127 | 2  | 0.0040 | 0.0080 |

---

CD: Crohn's disease; UC: ulcerative colitis; IBD: inflammatory bowel disease; SLE: systematic lupus erythematosus; RA: rheumatoid arthritis; MS: multiple sclerosis; Pso: psoriasis; T1DM: type 1 diabetes mellitus; ND: no data. <sup>a, b, c</sup>: different diseases; <sup>d, e, f, g</sup>: different populations; <sup>h, i</sup>: different samples.
