# Supplementary material for: Association of TYK2 polymorphisms with autoimmune diseases: A comprehensive and updated systematic review with meta-analysis
Source: PubMed Central journal article supplement (PMC8097517; doi:10.1590/1678-4685-gmb-2020-0425), 2021-05-03
Supplement: 1415-4757-GMB-44-2-e20200425-s5.pdf [file 1415-4757-GMB-44-2-e20200425-s5.pdf]

**Supplementary Material to “Association of *TYK2* polymorphisms with autoimmune diseases: A comprehensive and updated systematic review with meta-analysis”**

**Table S2** - Newcastle-Ottawa and Clark-Baudouin quality assessment scale for the studies included in the meta-analysis.

| <b>Author</b>                 | <b>Year</b> | <b>Newcastle-Ottawa Score</b> | <b>Clark-Baudouin Score</b> |
|-------------------------------|-------------|-------------------------------|-----------------------------|
| <i>Almlöf et al.</i>          | 2017        | 9                             | 10                          |
| <i>Alonso-Pérez et al.</i>    | 2014        | 8                             | 9                           |
| <i>Ban et al.</i>             | 2009        | 8                             | 9                           |
| <i>Can et al.</i>             | 2015        | 8                             | 9                           |
| <i>Contreras-Cubas et al.</i> | 2019        | 9                             | 10                          |
| <i>Couturier et al.</i>       | 2011        | 8                             | 9                           |
| <i>Diogo et al.</i>           | 2015        | 9                             | 10                          |
| <i>Ellinghaus et al.</i>      | 2016        | 9                             | 10                          |
| <i>Graciolo et al.</i>        | 2019        | 8                             | 8                           |
| <i>Graham et al.</i>          | 2011        | 7                             | 8                           |
| <i>Harley et al.</i>          | 2008        | 9                             | 9                           |
| <i>Hellquist et al.</i>       | 2009        | 8                             | 9                           |
| <i>Järvinen et al.</i>        | 2010        | 7                             | 8                           |
| <i>Kyogoku et al.</i>         | 2009        | 8                             | 8                           |
| <i>Langefeld et al.</i>       | 2017        | 9                             | 10                          |
| <i>Li et al.</i>              | 2011        | 7                             | 8                           |
| <i>Lian et al.</i>            | 2013        | 6                             | 7                           |
| <i>López-Isac et al.</i>      | 2016        | 8                             | 9                           |

| <b>Author</b>                 | <b>Year</b> | <b>Newcastle-Ottawa Score</b> | <b>Clark-Baudouin Score</b> |
|-------------------------------|-------------|-------------------------------|-----------------------------|
| Mero <i>et al.</i>            | 2010        | 8                             | 8                           |
| Mohamadhosseini <i>et al.</i> | 2019        | 9                             | 9                           |
| Myrthianou <i>et al.</i>      | 2017        | 8                             | 9                           |
| Nagafuchi <i>et al.</i>       | 2015        | 8                             | 8                           |
| Prieto-Pérez <i>et al.</i>    | 2015        | 9                             | 10                          |
| Qiu <i>et al.</i>             | 2013        | 9                             | 10                          |
| Sato <i>et al.</i>            | 2009        | 8                             | 9                           |
| Shaiq <i>et al.</i>           | 2013        | 7                             | 8                           |
| Sigurdsson <i>et al.</i>      | 2005        | 8                             | 9                           |
| Sigurdsson <i>et al.</i>      | 2007        | 8                             | 9                           |
| Strange <i>et al.</i>         | 2010        | 9                             | 9                           |
| Suarez-Gestal <i>et al.</i>   | 2009        | 8                             | 9                           |
| Suarez-Gestal <i>et al.</i>   | 2009        | 9                             | 10                          |
| Tang <i>et al.</i>            | 2015        | 9                             | 9                           |
| Westra <i>et al.</i>          | 2018        | 9                             | 10                          |
| Zaplakhova <i>et al.</i>      | 2018        | 8                             | 9                           |

Quality of articles were calculated using the Newcastle-Ottawa Scale (NOS), as described in the Methods Section. Selection: minimum 1 – maximum 4 stars; Comparability: 0 – 1 star; and Exposure: 1 – 3 stars. In addition, the Clark-Baudouin Score (CBS) was also used to assess the quality of the studies. The CBS consists in a scoring systems that allows from 0 to 10 points regarding pre-defined criteria.
